# Supplementary material
Source: publisher figshare collection journal article supplement (https://gsapubs.figshare.com/ndownloader/files/23294330)

# 1 SUPPLEMENTARY MATERIAL CAPTIONS

## 2 TABLE A1. Spectral Library

3 Figure A. X-ray diffraction patterns of synthetic allophanic products. The pattern from the Si/Al  
 4 = 0.58 allophane sample was not included because it overlaps that of the Si/Al = 0.44 allophane  
 5 sample. Each pattern displays broad absorptions, indicating samples are X-ray amorphous.  
 6 Broad reflections at 0.35, 0.22, and 0.14 nm confirm the structure of allophane, while an intense  
 7 reflection at 0.37 and weaker reflections at 0.22 and 0.14 nm are consistent with a high-Si  
 8 aluminosilicate gel.

9 Figure B. Bright field transmission electron microscope images of synthetic allophanic products  
 10 on holey carbon grids. Samples are composed of gel-like particles or aggregates of roughly  
 11 spherical particles ~5 nm in diameter, consistent with the morphology of natural allophane. a, b)  
 12 Aluminosilicate gel (Si/Al = 5.6) is composed of aggregates of spherical particles ~5 nm in  
 13 diameter and has a mottled appearance compared to the carbon grid. d) Al-rich product (Si/Al =  
 14 0.44) is composed of irregularly shaped gel-like particles. f) Products with intermediate Si/Al  
 15 ratios (Si/Al = 0.92) are composed of irregularly shaped gel-like particles as in Al-rich products,  
 16 but on closer inspection, reveal a spheroidal morphology (g). Electron diffraction patterns of all  
 17 products show they are amorphous (c,e,h).

|                                                                                                                                                                                                                                                                                                                                                                                                                                                                                                                                                                                                                                                       |                                                                                                                                                                                                                                                                                                                                                                                                                                                                                                                                                                                                                                                                                                                                                                                                    |
|-------------------------------------------------------------------------------------------------------------------------------------------------------------------------------------------------------------------------------------------------------------------------------------------------------------------------------------------------------------------------------------------------------------------------------------------------------------------------------------------------------------------------------------------------------------------------------------------------------------------------------------------------------|----------------------------------------------------------------------------------------------------------------------------------------------------------------------------------------------------------------------------------------------------------------------------------------------------------------------------------------------------------------------------------------------------------------------------------------------------------------------------------------------------------------------------------------------------------------------------------------------------------------------------------------------------------------------------------------------------------------------------------------------------------------------------------------------------|
| <b>Plagioclase group</b><br>Albite WAR-0244<br>Oligoclase WAR-5804<br>Andesine BUR-240<br>Labradorite WAR-4524<br>Bytownite WAR-1384<br>Anorthite BUR-340<br>Shocked Anorthite 22.6 GPa<br>Shocked Anorthite 56.3 GPa<br><br><b>Low-calcium pyroxene group</b><br>Bronzite NMNH-93527<br>Enstatite HS-9.4B<br>Bronzite BUR-1920<br>Avg. Lindsley pigeonite<br><br><b>High-calcium pyroxene group</b><br>Diopside WAR-6474<br>Augite NMNH-9780<br>Augite NMNH-122302<br>Hedenbergite (manganoan) DSM-HED01<br><br><b>Olivine group</b><br>Forsterite BUR-3720A<br>Fayalite WAR-RGFAY01<br>KI 3362 Fo60<br>KI 3115 Fo68<br>KI 3373 Fo35<br>KI 3008 Fo10 | <b>High-silica group</b><br>Biotite BUR-840<br>Muscovite WAR-6474<br>Serpentine HS-8.4B<br>Illite IMt-1 <0.2 microns<br>Montmorillonite (Ca) STx-1<br>Saponite <0.2 microns<br>K-rich volcanic glass<br>SiO <sub>2</sub> glass<br>Opal-A<br>Aluminous opal<br>Antigorite NMNH-47108<br>Crystalline heulandite<br>Crystalline stilbite<br><br><b>Allophane group</b><br>Allophane, molar Si/Al ratio 0.44<br>Allophane, molar Si/Al ratio 0.58<br>Allophane, molar Si/Al ratio 0.92<br>Allophanic gel, molar Si/Al ratio 5.6<br><br><b>Other group</b><br>Quartz BUR-4120<br>Microcline BUR-3460<br>Orthoclase WAR-RGSAN01<br>Magnesiohastingsite HS-115.4B<br>Actinolite HS-116.4B<br>Magnesiohornblende WAR-0354<br>Hematite BUR-2600<br>Calcite C40<br>Dolomite C20<br>Anhydrite S9<br>Gypsum S6 |
|-------------------------------------------------------------------------------------------------------------------------------------------------------------------------------------------------------------------------------------------------------------------------------------------------------------------------------------------------------------------------------------------------------------------------------------------------------------------------------------------------------------------------------------------------------------------------------------------------------------------------------------------------------|----------------------------------------------------------------------------------------------------------------------------------------------------------------------------------------------------------------------------------------------------------------------------------------------------------------------------------------------------------------------------------------------------------------------------------------------------------------------------------------------------------------------------------------------------------------------------------------------------------------------------------------------------------------------------------------------------------------------------------------------------------------------------------------------------|

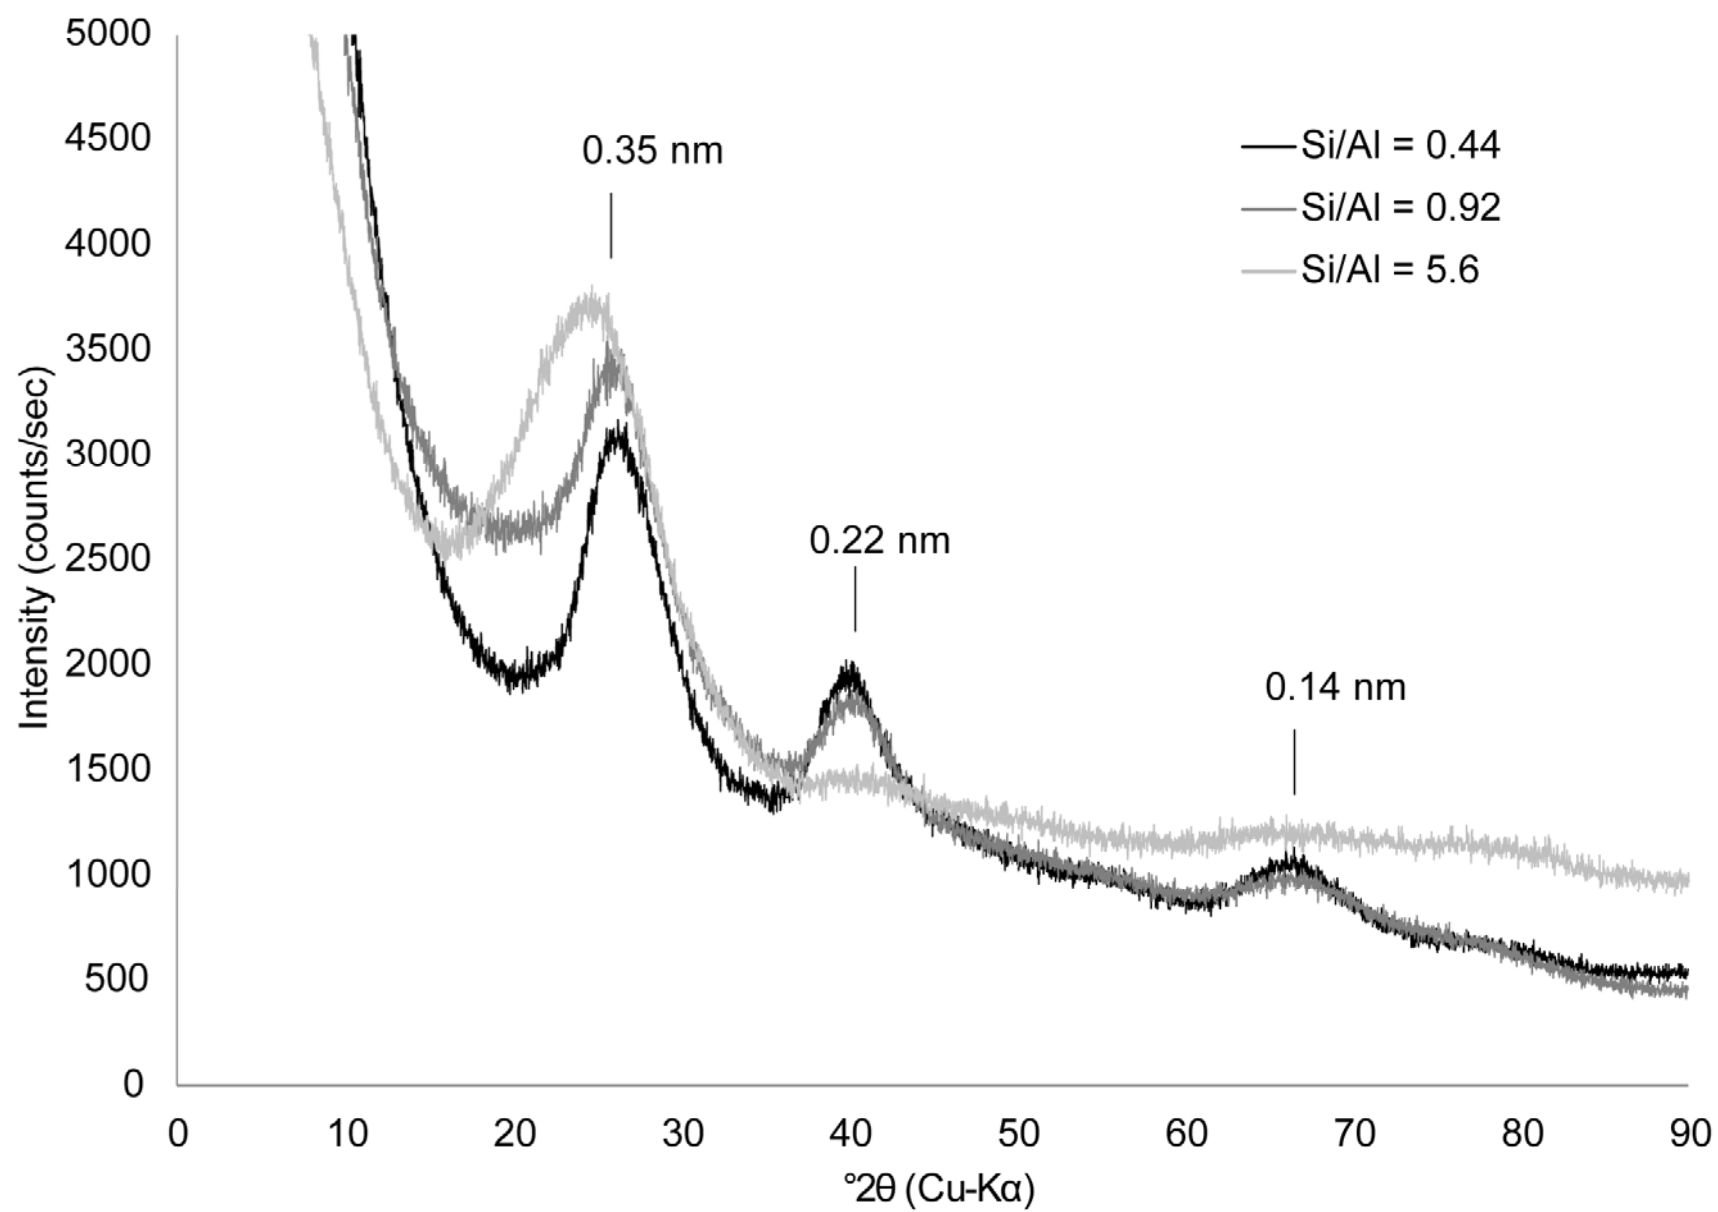

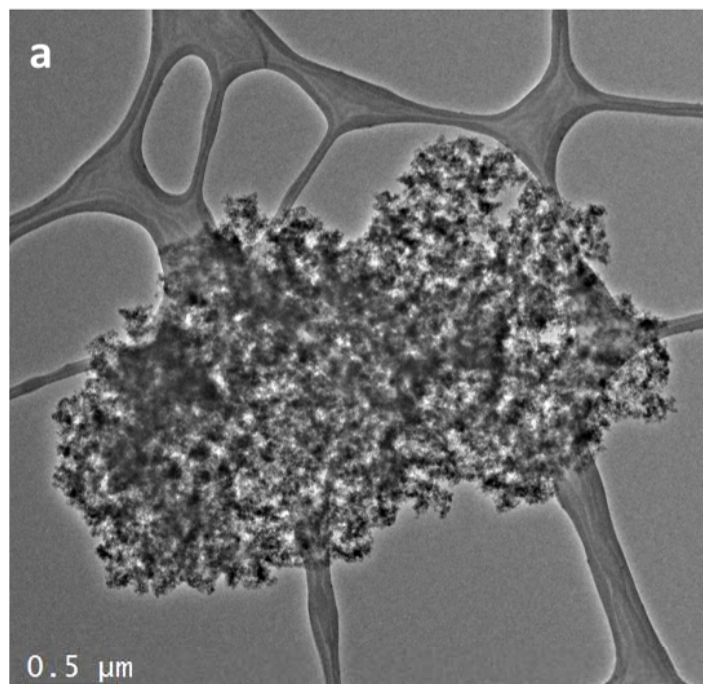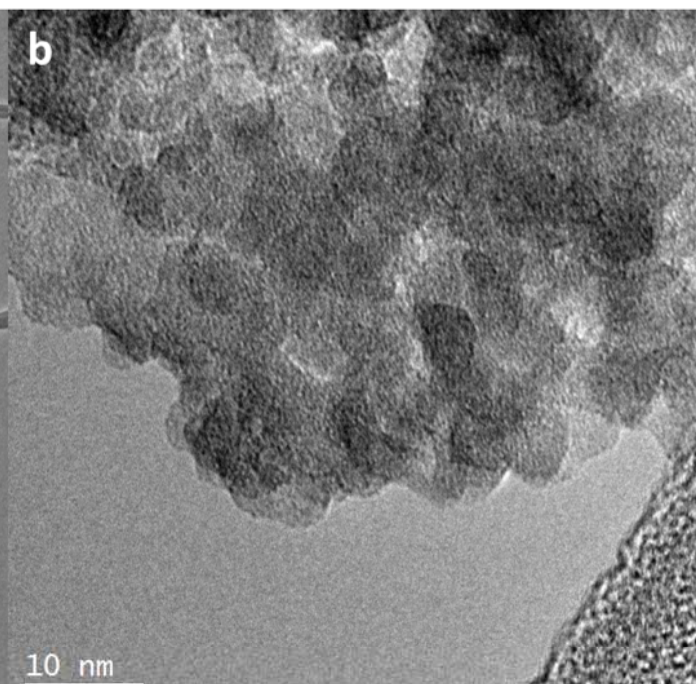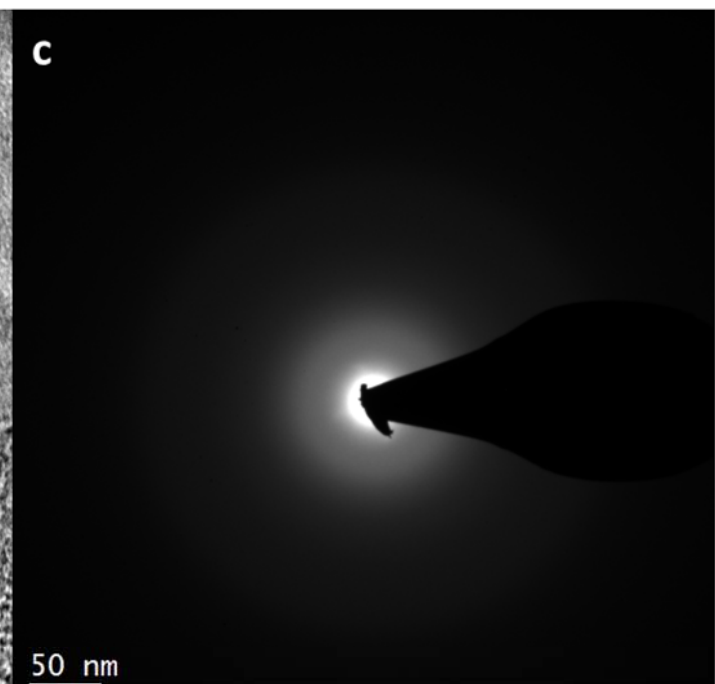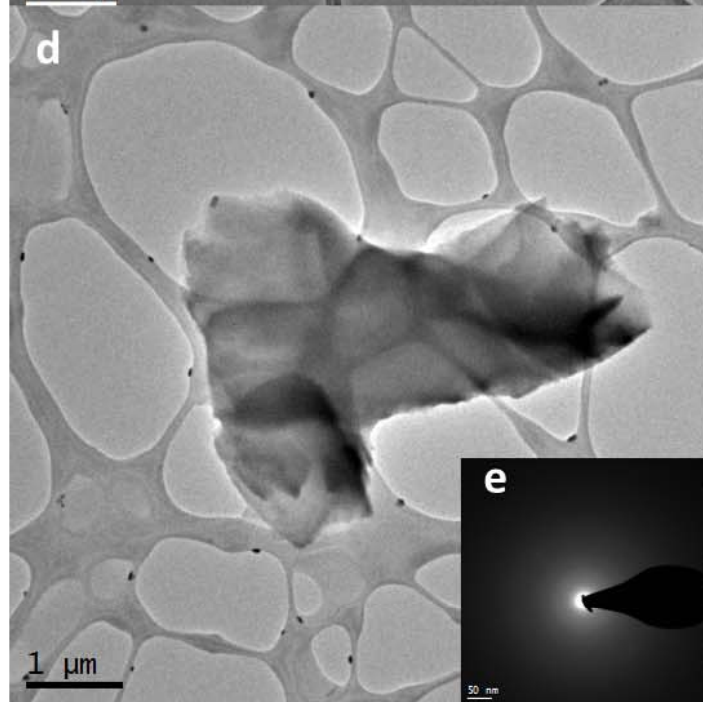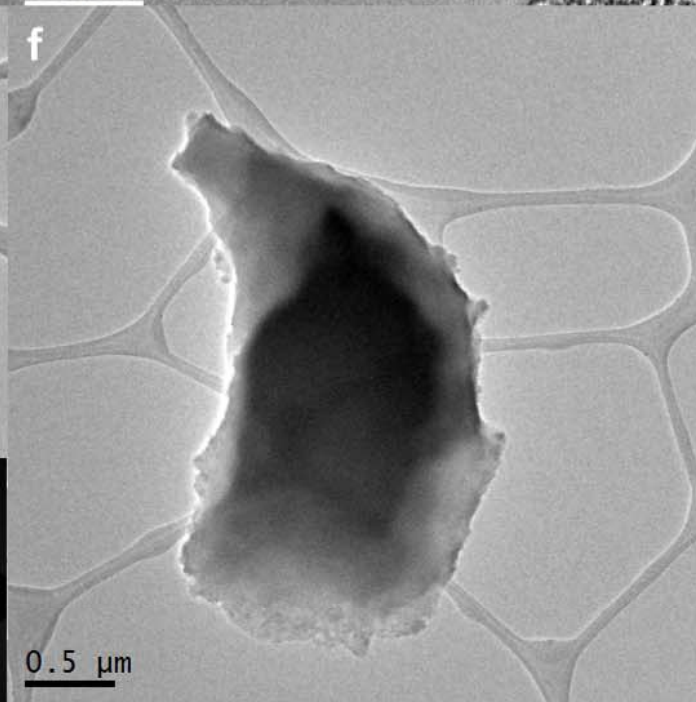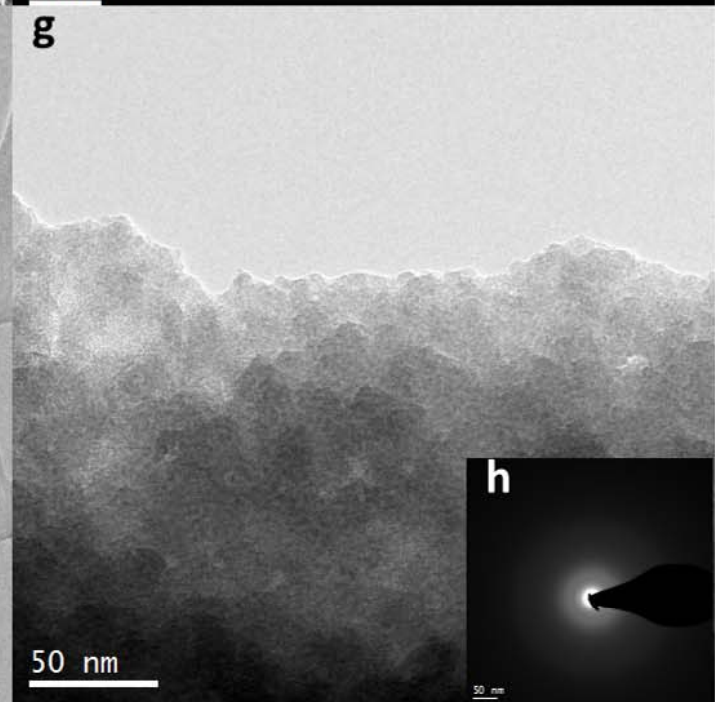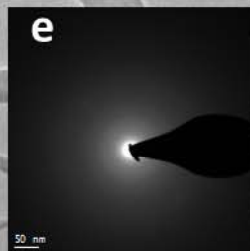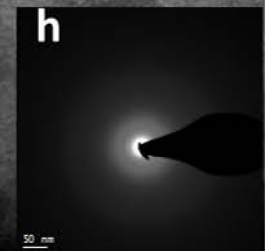

Supplement: Supplementary file 1 [file 23294330]
